# Supplementary material for: Global donor and acceptor splicing site kinetics in human cells
Source: eLife journal article supplement (doi:10.7554/elife.45056), 2019-04-26

**A**

$$\frac{d}{dt} c_D = \alpha_D - \beta_D c_D$$

$$\frac{d}{dt} c_A = \alpha_A - \beta_A c_A$$

$$\frac{d}{dt} c_J = \alpha_J - \beta_J c_J$$

|                        |                                             |
|------------------------|---------------------------------------------|
| $\alpha_D$             | Donor bond steady-state synthesis rate      |
| $\alpha_A$             | Acceptor bond steady-state synthesis rate   |
| $\alpha_J$             | Junction bond steady-state synthesis rate   |
| $\beta_D$              | Donor bond steady-state degradation rate    |
| $\beta_A$              | Acceptor bond steady-state degradation rate |
| $\beta_J$              | Junction bond steady-state degradation rate |
| $\frac{\log 2}{\beta}$ | Bond half-life                              |

**B**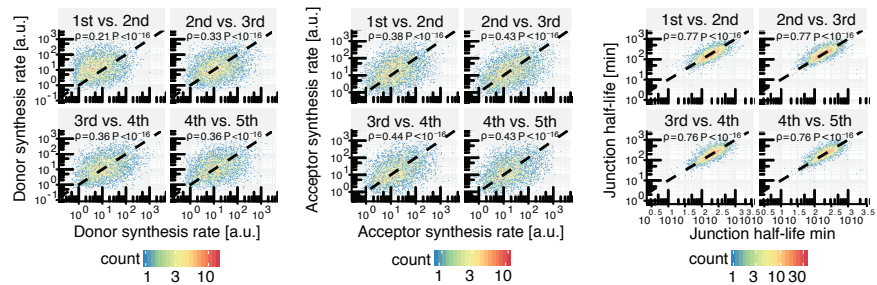**C**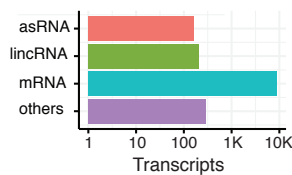**D**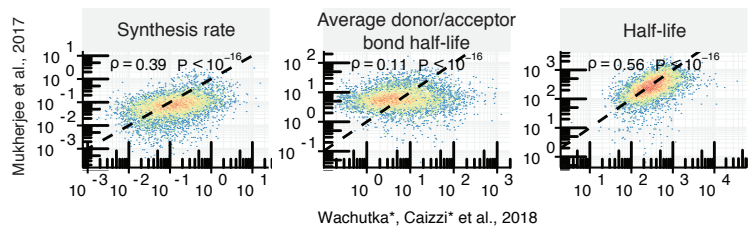**E**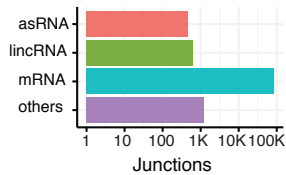**F**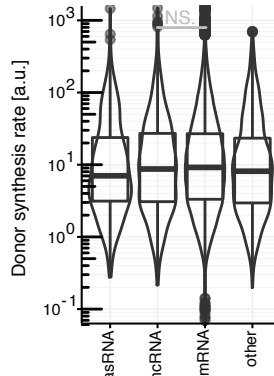**G**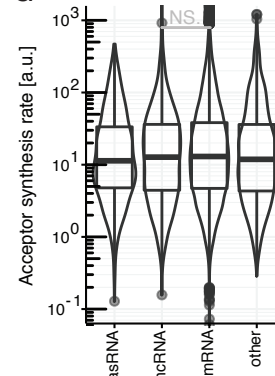**H**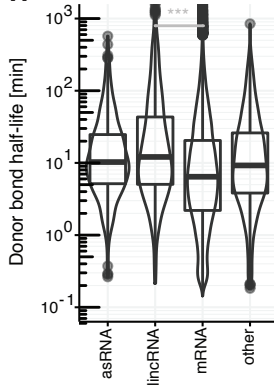**I**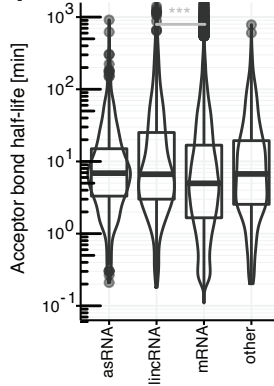**J**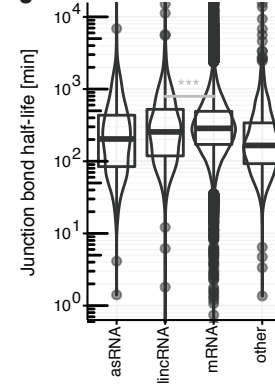

Supplement: supp [file elife-45056-supp-v1.zip]
