# Supplementary figures and images for: Global donor and acceptor splicing site kinetics in human cells
Source: eLife journal article supplement (doi:10.7554/elife.45056), 2019-04-26

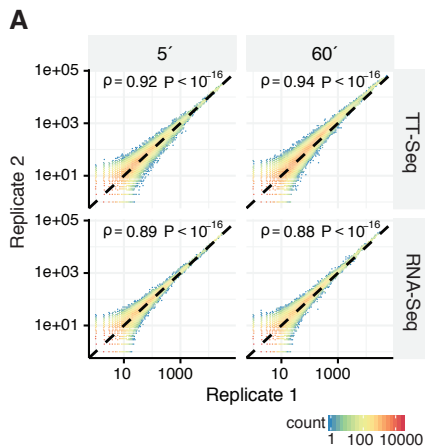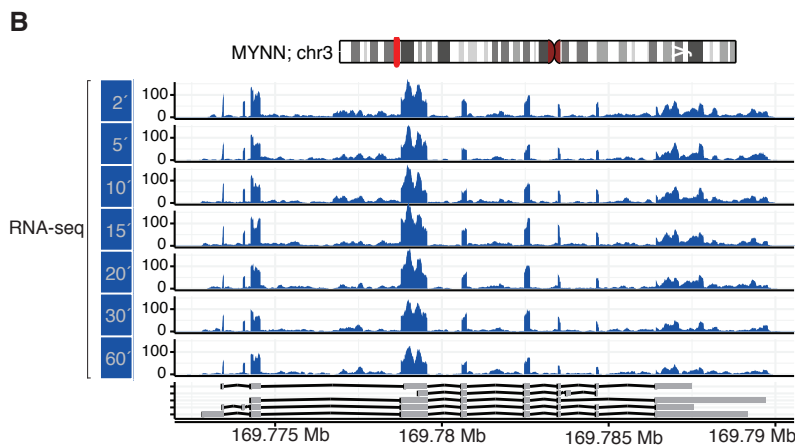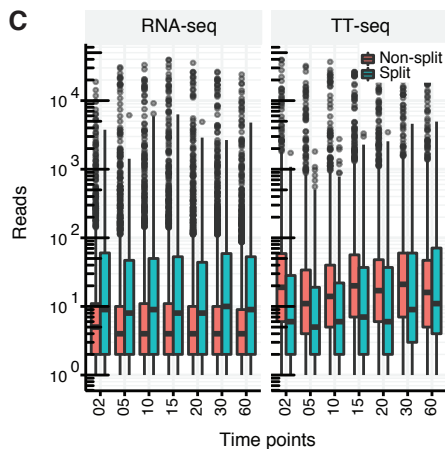

Supplement: supp [file elife-45056-supp-v1.zip]

**A**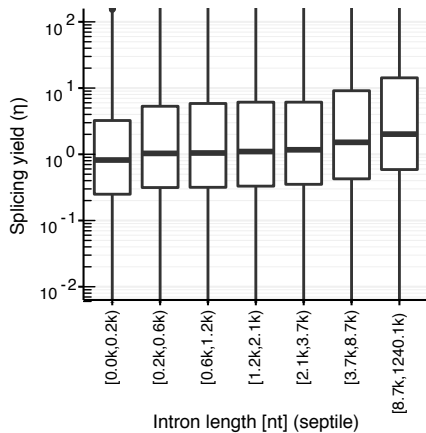**B**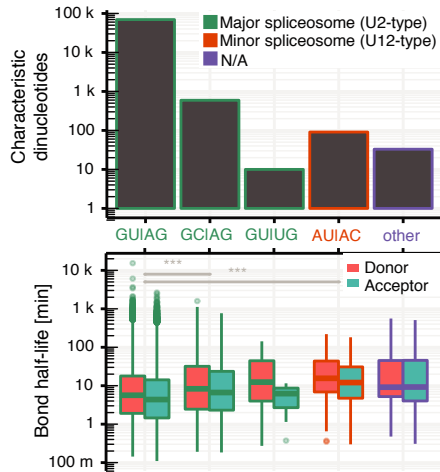

Supplement: supp [file elife-45056-supp-v1.zip]

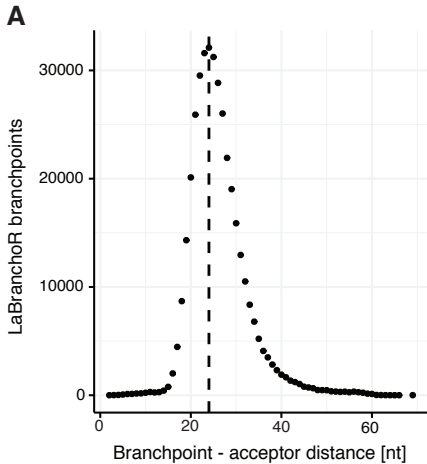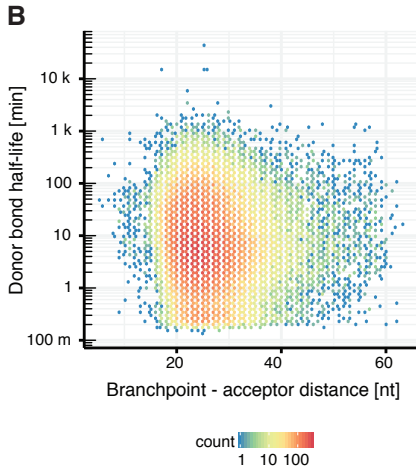

Supplement: supp [file elife-45056-supp-v1.zip]

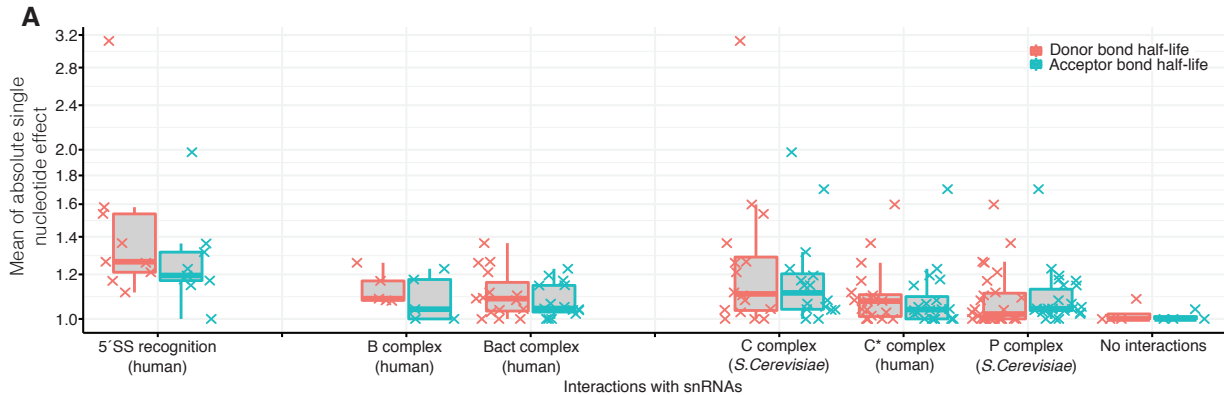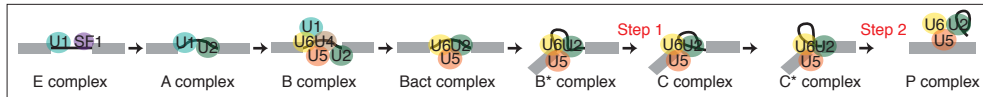

Supplement: supp [file elife-45056-supp-v1.zip]

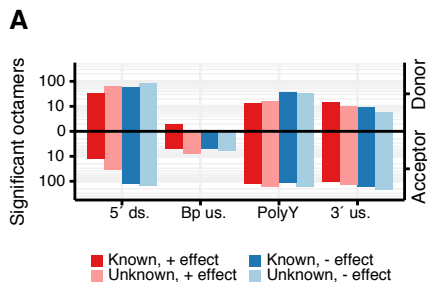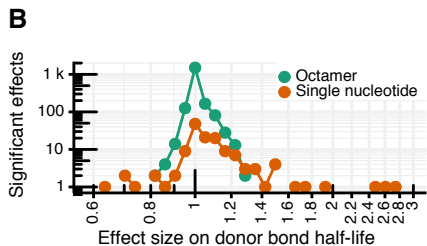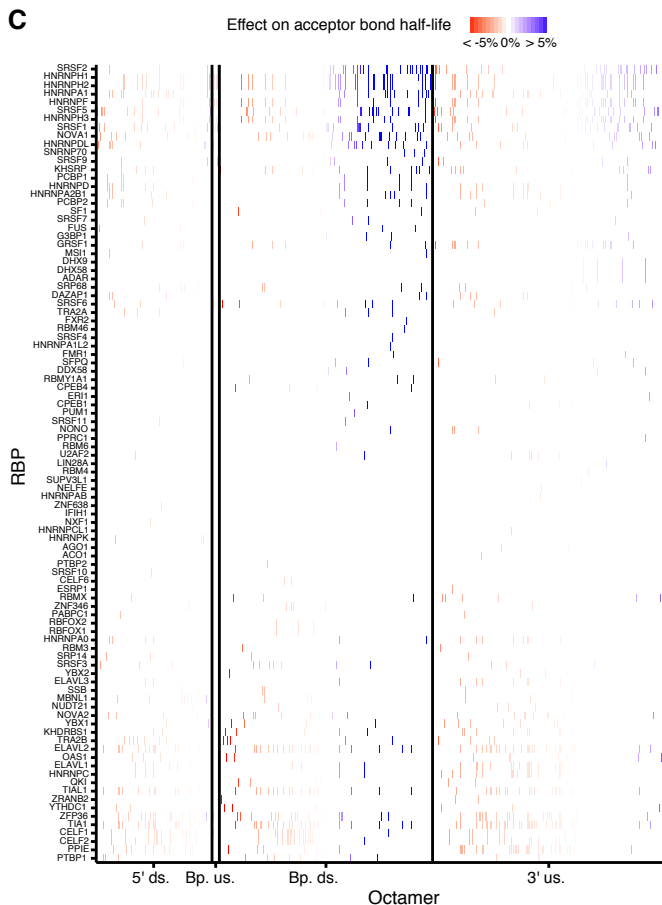

Supplement: supp [file elife-45056-supp-v1.zip]
